# Supplementary material for: A Human IPS Model Implicates Embryonic B-Myeloid Fate Restriction as Developmental Susceptibility to B Acute Lymphoblastic Leukemia-Associated ETV6-RUNX1
Source: PubMed Central journal article supplement (PMC5807056; doi:10.1016/j.devcel.2017.12.005), 2018-02-05
Supplement: mmc1.pdf [file mmc1.pdf]

**Developmental Cell, Volume 44**

**Supplemental Information**

**A Human IPS Model Implicates Embryonic B-Myeloid Fate Restriction  
as Developmental Susceptibility to B Acute Lymphoblastic Leukemia-  
Associated ETV6-RUNX1**

**Charlotta Böiers, Simon E. Richardson, Emma Laycock, Alya Zriwil, Virginia A. Turati, John Brown, Jason P. Wray, Dapeng Wang, Chela James, Javier Herrero, Ewa Sitnicka, Stefan Karlsson, Andrew J.H. Smith, Sten Erik W. Jacobsen, and Tariq Enver**

SUPPLEMENTAL INFORMATION

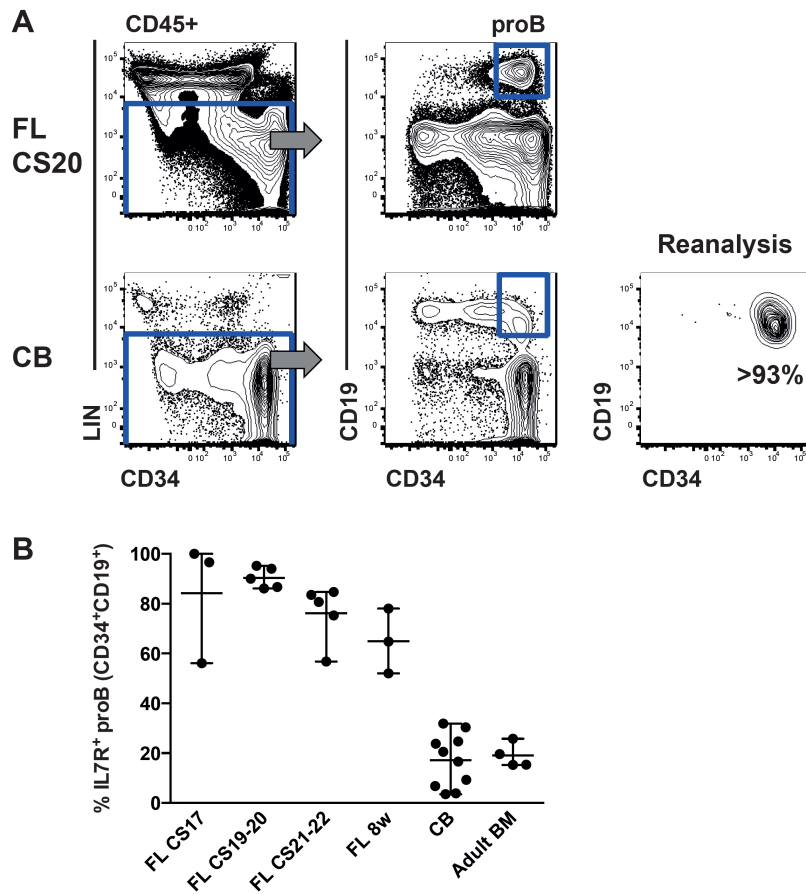

**Figure S1 (related to Figure 1)**

- A. Flow cytometry profile showing gating strategy of proB cells (CD34<sup>+</sup>CD19<sup>+</sup>). Cells were first gated for viability, singlets and scatter and after that for CD45 positivity. Further gating is indicated in the figure. Reanalysis was normally done on cord blood, due to the low cell number that could be obtained from the fetal samples. ProB cells were typically sorted with >93% purity as indicated in the right panel.
- B. Percentage proB cells expressing surface IL7R at different time points of development. Each dot represents one biological sample. Mean with range.

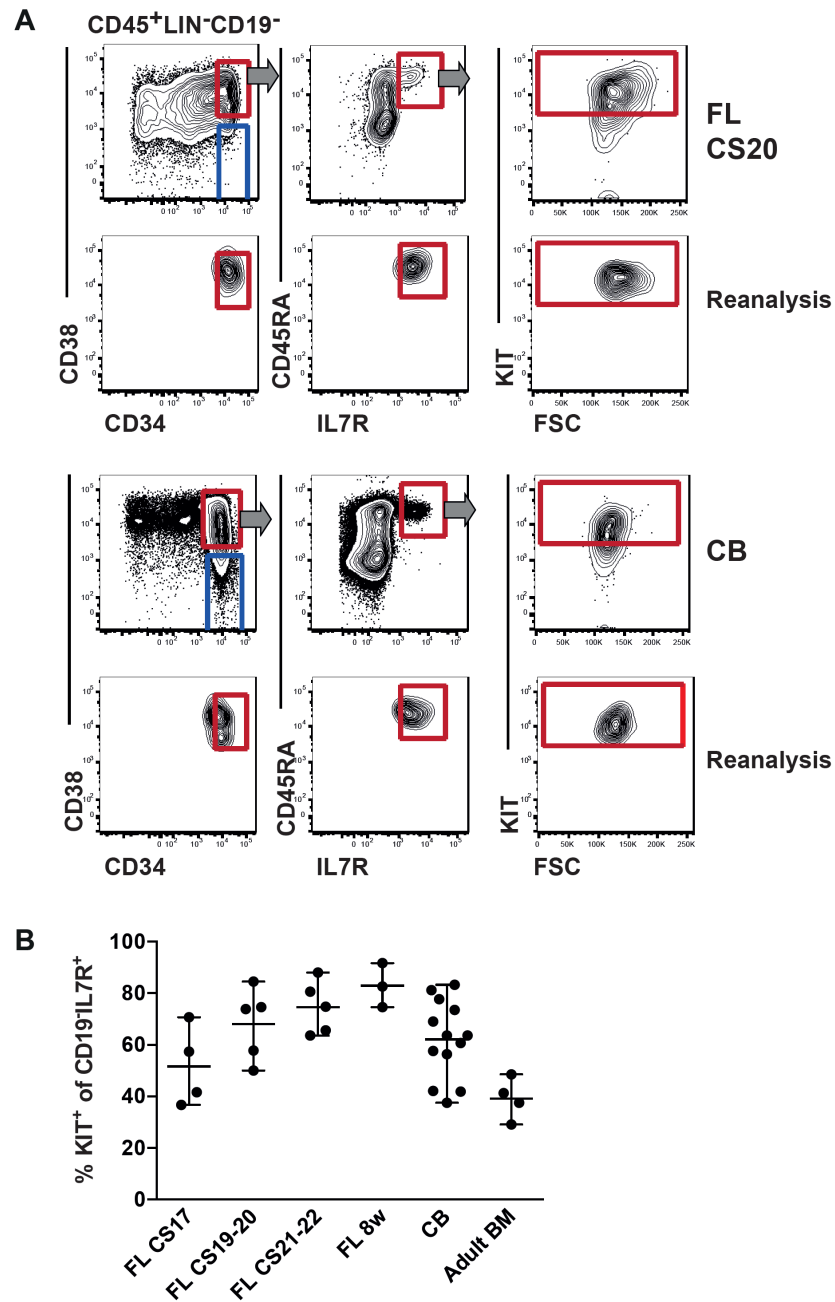

**Figure S2 (related to Figure 2)**

- A. Flow cytometry profiles showing sorting strategy and reanalyses for IL7R<sup>+</sup>KIT<sup>+</sup> progenitors. Viable cells were gated for CD45 positivity, then LIN and CD19 negativity. Further gating as indicated in the figure. CD34<sup>+</sup>CD38<sup>-</sup> gate is indicated in blue. Reanalyses are shown for FL (top) as well as CB (bottom), but were normally done on CB and only occasionally on FL, due to the low cell number that could be obtained from the fetal samples. The IL7R<sup>+</sup>KIT<sup>+</sup> progenitor was typically sorted with >94% purity.
- B. Percentage of IL7R<sup>+</sup> progenitor cells expressing KIT at different time points of development. Each dot represents one biological sample. Mean with range.

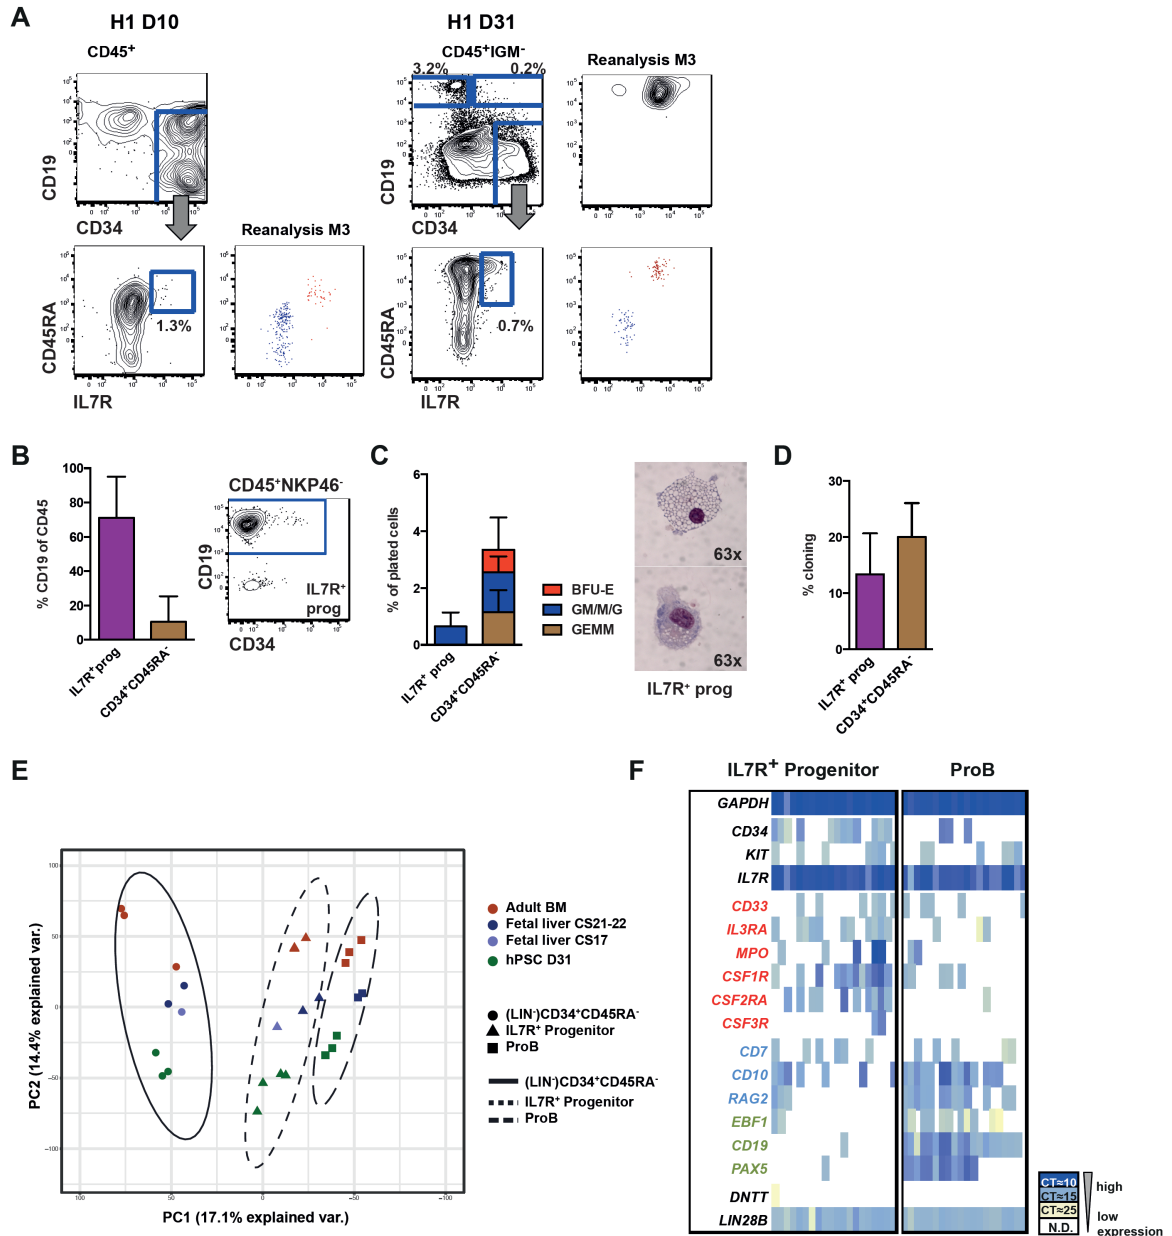

**Figure S3 (related to Figure 4)**

- A. H1 hESCs were analyzed for CD19<sup>+</sup>B cells (**top**) and IL7R<sup>+</sup> progenitor (**bottom**) at D10 (**left**) and D31 (**right**) of differentiation. Cells were gated CD45<sup>+</sup> (D10) or CD45<sup>+</sup>IGM<sup>-</sup> (D31). Further gating is indicated in the figure. Numbers show mean percentages of CD45<sup>+</sup> cells. Representative reanalysis of MIFF3 hPSCs is shown to the right of each plot, IL7R<sup>+</sup> progenitor (red) and CD34<sup>+</sup>CD45RA<sup>-</sup> control cells (blue), proB cells right top panel. Populations were typically sorted with  $\geq 94\%$  purity.
- B. B cell potential of the MIFF3 derived IL7R<sup>+</sup> progenitor (D31) was investigated on MS5 stroma. CD34<sup>+</sup>CD45RA<sup>-</sup> cells were cultured in parallel. Graph shows percent CD19<sup>+</sup> cells of total CD45<sup>+</sup> cells in the culture. Mean+SD, n=2. To the right: representative FACS analysis of the IL7R<sup>+</sup> progenitor readout.

- C. Myeloid potential of the IL7R<sup>+</sup> progenitor (derived from MIFF3 and H1 at D31) was investigated in semi-solid media. Primitive CD34<sup>+</sup>CD45RA<sup>-</sup> cells (also derived from hPSCs) were cultured in parallel. Graph shows percent colonies per plated number of cells. Mean+SD, n=2. To the right: typical macrophages derived from IL7R<sup>+</sup> progenitor culture.
- D. Myeloid potential of single hPSC-derived IL7R<sup>+</sup> progenitors (MIFF3 at D24-27) was investigated in liquid culture. Graph shows percent of wells with >10 cells. Primitive CD34<sup>+</sup>CD45RA<sup>-</sup> cells were cultured in parallel. Mean+SD, n=3.
- E. PCA calculated using RNA sequencing data from both human primary samples and hPSCs from D31 ((LIN<sup>-</sup>)CD34<sup>+</sup>CD45RA<sup>-</sup>, IL7R<sup>+</sup> progenitor and proB cells) of differentiation. Note that the IL7R progenitor compartment from very early CS17 FL here rests on the correct region of the PCA map whereas it is an outlier on the PCA built on only primary samples (Figure 4D). PC1 and PC2 are shown and each dot represents one individual sample. The ellipses show the 90% density function for that cell type. Legend is shown to the right.
- F. Single cell qPCR analysis of IL7R<sup>+</sup> progenitor and proB cells from H1 hESCs at D31 of differentiation. Each column represents one single cell. Only cells expressing *GAPDH* are shown. Color code based on CT values. Genes labeled in red are myeloid, blue lymphoid and green B cell genes, n=1, 20 cells investigated/population.

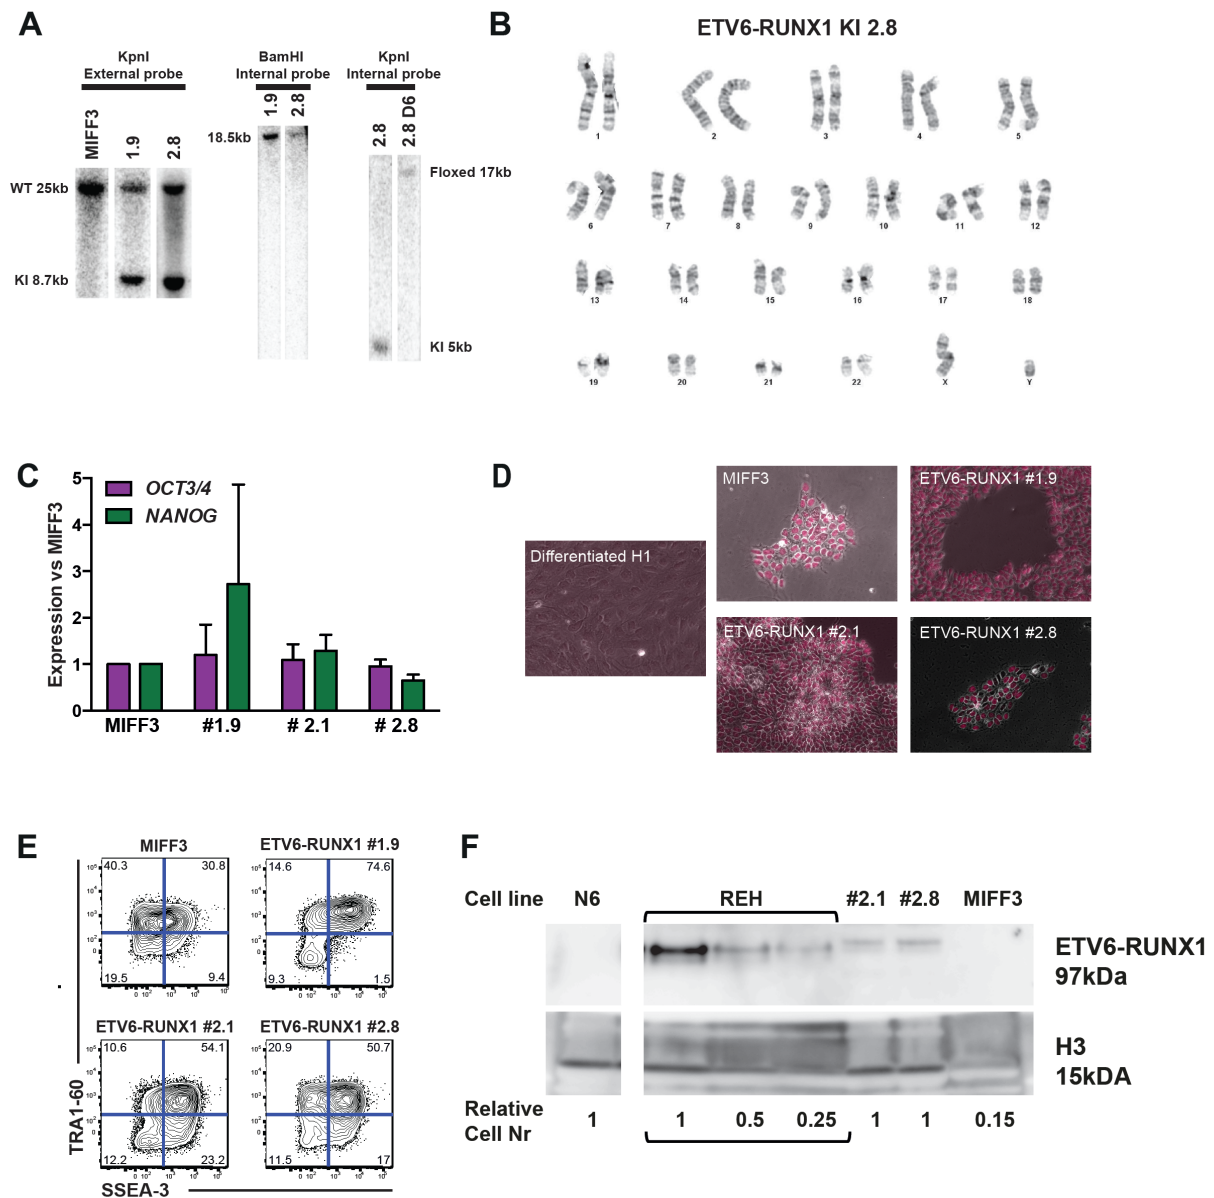

**Figure S4 (related to Figure 5)**

- Representative southern blot hybridizations of genome engineered MIFF3 hIPSCs. Left: Successful targeting of *ETV6* allele as shown by external *ETV6* probe on *KpnI* digested DNA (WT 25kb, KI 8.7kb). Middle: Internal probe (*neoR*) on *BamHI* digested DNA showing single insertion at 18.5kb. Right: Knock in clone #2.8 before (left - KI 5kb) and after (right - reverted 17kb) floxing with cre recombinase using internal (*neoR*) probe on *KpnI* digested DNA.
- Karyotype of middle passage ETV6-RUNX1 knock-in hPSC line #2.8.
- Quantitative gene-expression analysis of unmodified MIFF3 and 3 successfully targeted ETV6-RUNX1 knock in clones for the pluripotency genes *OCT3/4* and *NANOG*. Expression is normalized to  $\beta$  *ACTIN* and presented relative to MIFF3. Mean+SD, n=2.
- Immunostaining for nuclear OCT4 on fixed MIFF3 and 3 different ETV6-RUNX1 knock-in clones. Differentiated H1 is shown as control.

- E. Flow cytometry analysis of the pluripotency surface markers TRA1-60 and SSEA3 in MIFF3 and 3 different ETV6-RUNX1 knock-in clones.
- F. Western blot of ETV6-RUNX1 protein from FACS sorted hematopoietic progenitors (CD45<sup>+</sup>Venus<sup>+</sup>) derived from ETV6-RUNX1 knock in #2.1 and #2.8. Positive control: ETV6-RUNX1 B-ALL cell line (REH). Negative controls: MIFF3 and NALM6 (N6). Note knock-in ETV6-RUNX1 protein includes additional V5 tag. One lane has been removed but all samples were run on the same gel.

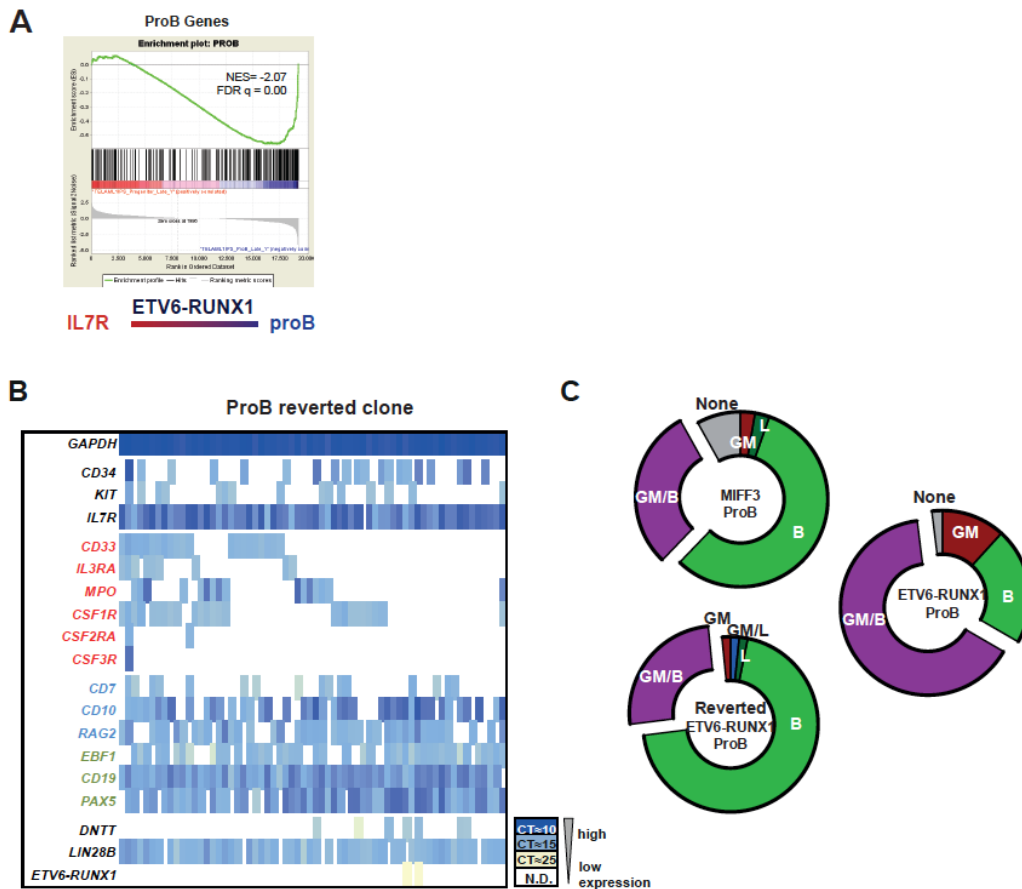

**Figure S5 (related to Figure 6)**

- Gene set enrichment analysis (GSEA) comparing the proB cell gene expression of ETV6-RUNX1<sup>+</sup> IL7R progenitor and ETV6-RUNX1<sup>+</sup> proB cells.
- Single cell qPCR analysis of proB cells (CD34<sup>+</sup>CD19<sup>+</sup>) from ETV6-RUNX1 reverted clone. Each column represents one single cell. Only cells expressing *GAPDH* are shown. Color code according to CT values. Gene sets: red, myeloid; blue, lymphoid; green, B lineage related. n=2, 64 cells investigated.
- Co-expression of lineage associated genes based on single cell data in Figure 6E, and Figure S5B. A cell is considered myeloid (GM) if expressing 2 of the myeloid genes, lymphoid (L) if 2 of the genes listed in blue and B primed (B) if expressing 2 of the genes listed in green. Co-expression of GM with L or B genes are labeled GM/L and GM/B respectively (see *STAR Method*). Data from D31 proB are shown (MIFF3, ETV6-RUNX1 hIPS and ETV6-RUNX1 hIPS reverted clones).



**Table S1: (related to STAR Methods)****Oligonucleotides**

| <b>Oligonucleotides</b>        | <b>Source</b> | <b>Identifier</b>                                                                                            | <b>Used for PCA</b> |
|--------------------------------|---------------|--------------------------------------------------------------------------------------------------------------|---------------------|
| <i>CCR9</i>                    | ThermoFisher  | Hs00258535_m1                                                                                                | x                   |
| <i>CD10</i>                    | ThermoFisher  | Hs00153510_m1                                                                                                | x                   |
| <i>CD19</i>                    | ThermoFisher  | Hs00174333_m1                                                                                                | x                   |
| <i>CD33</i>                    | ThermoFisher  | Hs01076281_m1                                                                                                | x                   |
| <i>CD34</i>                    | ThermoFisher  | Hs00990732_m1                                                                                                | x                   |
| <i>CD38</i>                    | ThermoFisher  | Hs01120071_m1                                                                                                | x                   |
| <i>CD62L (SELL)</i>            | ThermoFisher  | Hs00174151_m1                                                                                                | x                   |
| <i>CD7</i>                     | ThermoFisher  | Hs00196191_m1                                                                                                | x                   |
| <i>CKIT</i>                    | ThermoFisher  | Hs00174029_m1                                                                                                | x                   |
| <i>CRLF2</i>                   | ThermoFisher  | Hs00845692_m1                                                                                                | x                   |
| <i>CSF1R (M-CSFR)</i>          | ThermoFisher  | Hs00911250_m1                                                                                                | x                   |
| <i>CSF2RA (GM-CSFR)</i>        | ThermoFisher  | Hs00538900_m1                                                                                                | x                   |
| <i>CSF3R (G-CSF R)</i>         | ThermoFisher  | Hs01114427_m1                                                                                                | x                   |
| <i>DNTT</i>                    | ThermoFisher  | Hs00172743_m1                                                                                                | x                   |
| <i>E2A (TCF-3)</i>             | ThermoFisher  | Hs00413032_m1                                                                                                | x                   |
| <i>EBF1</i>                    | ThermoFisher  | Hs00395513_m1                                                                                                | x                   |
| <i>EPOR</i>                    | ThermoFisher  | Hs00181092_m1                                                                                                | x                   |
| <i>ETV6</i>                    | ThermoFisher  | HS00231101_m1                                                                                                |                     |
| <i>ETV6-RUNX1*</i>             | ThermoFisher  | F <i>TEL</i> : CTCTGTCTCCCCGCCTGAA<br>P <i>TEL</i> : TCCCAATGGGCATGGCGTGC<br>R <i>AML1</i> : CGGCTCGTGCTGGCA |                     |
| <i>FLT3</i>                    | ThermoFisher  | Hs00174690_m1                                                                                                | x                   |
| <i>GATA1</i>                   | ThermoFisher  | Hs01085823_m1                                                                                                | x                   |
| <i>GATA3</i>                   | ThermoFisher  | Hs00231122_m1                                                                                                | x                   |
| <i>GAPDH</i>                   | ThermoFisher  | Hs99999905_m1                                                                                                | x                   |
| <i>IGHM</i>                    | ThermoFisher  | Hs00378435_m1                                                                                                | x                   |
| <i>IKAROS</i>                  | ThermoFisher  | Hs00172991_m1                                                                                                | x                   |
| <i>IL2RG</i>                   | ThermoFisher  | Hs00953624_m1                                                                                                | x                   |
| <i>IL3RA</i>                   | ThermoFisher  | Hs00608141_m1                                                                                                | x                   |
| <i>IL7R</i>                    | ThermoFisher  | Hs00902334_m1                                                                                                | x                   |
| <i>LIN28B</i>                  | ThermoFisher  | Hs01013729_m1                                                                                                | x                   |
| <i>MPL</i>                     | ThermoFisher  | Hs00180489_m1                                                                                                | x                   |
| <i>MPO</i>                     | ThermoFisher  | Hs00165162_m1                                                                                                | x                   |
| <i>NOTCH1</i>                  | ThermoFisher  | Hs01062011_m1                                                                                                | x                   |
| <i>PAX5</i>                    | ThermoFisher  | Hs00277134_m1                                                                                                | x                   |
| <i>PRET<math>\alpha</math></i> | ThermoFisher  | Hs00300125_m1                                                                                                | x                   |
| <i>PU.1</i>                    | ThermoFisher  | Hs02786711_m1                                                                                                | x                   |
| <i>RAG2</i>                    | ThermoFisher  | Hs00379177_m1                                                                                                | x                   |
| <i>TCF7</i>                    | ThermoFisher  | Hs00175273_m1                                                                                                | x                   |
| <i>VWF</i>                     | ThermoFisher  | Hs00169795_m1                                                                                                | x                   |
| <i>OCT3/4</i>                  | IDT           | F: GAAGGAGAAGCTGGAGCAAA                                                                                      | N/A                 |

|                              |              |                                                                                  |            |
|------------------------------|--------------|----------------------------------------------------------------------------------|------------|
|                              |              | R: CTTCTGCTTCAGGAGCTTG                                                           | N/A        |
| <i>NANOG</i>                 | IDT          | F: GATTTGTGGGCCTGAAGAAA<br>R: CAGGGCTGTCCTGAATAAGC                               | N/A<br>N/A |
| <i>β-ACTIN</i>               | ThermoFisher | Hs99999903 m1                                                                    | N/A        |
| <i>D<sub>H1</sub></i>        | IDT/Sigma    | GGCGGAATGTGTGCAGGC                                                               | N/A        |
| <i>D<sub>H2</sub></i>        | IDT/Sigma    | GCACTGGGCTCAGAGTCCTCT                                                            | N/A        |
| <i>D<sub>H3</sub></i>        | IDT/Sigma    | GTGGCCCTGGGAATATAAAA                                                             | N/A        |
| <i>D<sub>H4</sub></i>        | IDT/Sigma    | AGATCCCCAGGACGCAGCA                                                              | N/A        |
| <i>D<sub>H5</sub></i>        | IDT/Sigma    | CAGGGGGACACTGTGCATGT                                                             | N/A        |
| <i>D<sub>H6</sub></i>        | IDT/Sigma    | TGACCCAGCAAGGGAAGG                                                               | N/A        |
| <i>D<sub>H7</sub></i>        | IDT/Sigma    | CACAGGCCCCCTACCAGC                                                               | N/A        |
| <i>JH</i> consensus          | IDT/Sigma    | CTTACCTGAGGAGACGGTGACC                                                           | N/A        |
| 5' gap-repair                | IDT          | GCTAATATATATAATATATTATATATACGAATATACTAATTATGGCTGACTTAATA<br>AGATGATCTTCTTGAGATCG |            |
| 3' gap-repair                | IDT          | CGTAAAAGTTCTGTCATTAAGTGAATAGCCATAAAAAAGCCTTTAAATCTCTTACC<br>AATGCTTAATCAGTGAGG   |            |
| 5' rpsL-genta                | IDT          | CACCATCCCAATTAGGCGCCCTCAAGGCTCTCTGAGGCAATTGGAGGCATTA<br>ATTCTAATTTTGTGAC         |            |
| 3' rpsL-genta                | IDT          | AGCGGCTCATTAACCAAGCCATTAGGGATTTAGCCTCATCCAAGCAGAAGTTAGG<br>TGCGGTAATTGGG         |            |
| <i>ETV6</i> Southern probe F | IDT          | CCCATCTGAGAGGGACTGTG                                                             | N/A        |
| <i>ETV6</i> Southern probe R | IDT          | GTATCCGCAGCTAAAGGCATTG                                                           | N/A        |
| <i>neoR</i> Southern probe F | IDT          | GCTATTCGGCTATGACTGGG                                                             | N/A        |
| <i>neoR</i> Southern probe R | IDT          | GAAGGCGATAGAAGGCGATG                                                             | N/A        |

\* Gabert et al., *Leukemia*, 2003
